# Supplementary material for: Intratumoral KIT mutational heterogeneity and recurrent KIT/ PDGFRA mutations in KIT/PDGFRA wild-type gastrointestinal stromal tumors
Source: PubMed Central journal article supplement (PMC5058677; doi:10.18632/oncotarget.7148), 2016-02-02
Supplement: oncotarget-07-30241-s001.pdf [file oncotarget-07-30241-s001.pdf]

## Intratumoral KIT mutational heterogeneity and recurrent KIT/PDGFR $\alpha$ mutations in KIT/PDGFR $\alpha$ wild-type gastrointestinal stromal tumors

### Supplementary Materials

**Supplementary Table S1: The list of 48 genes**

|        |        |        |        |
|--------|--------|--------|--------|
| AKT1   | DDR2   | KIT    | RET    |
| AKT2   | DEPDC5 | KRAS   | ROS1   |
| ALK    | DPYD   | LKB1   | TERT   |
| ATRX   | EGFR   | MEK1   | TP53   |
| BIM    | F2     | MEK2   | TPMT   |
| BRAF   | F5     | MET    | TSC1   |
| BRCA1  | FGFR1  | NF1    | TSC2   |
| BRCA2  | FUBP1  | NPRL2  | UGT1A1 |
| CDKN2A | HER2   | NRAS   | VEGFA  |
| CDKN2B | HRAS   | PDGFRA | VEGFR1 |
| CIC    | IDH1   | PIK3CA | VEGFR2 |
| DAXX   | IDH2   | PTEN   | VEGFR3 |

**Supplementary Table S2: KRAS and BRAF variations identified in this study by next-generation sequencing**

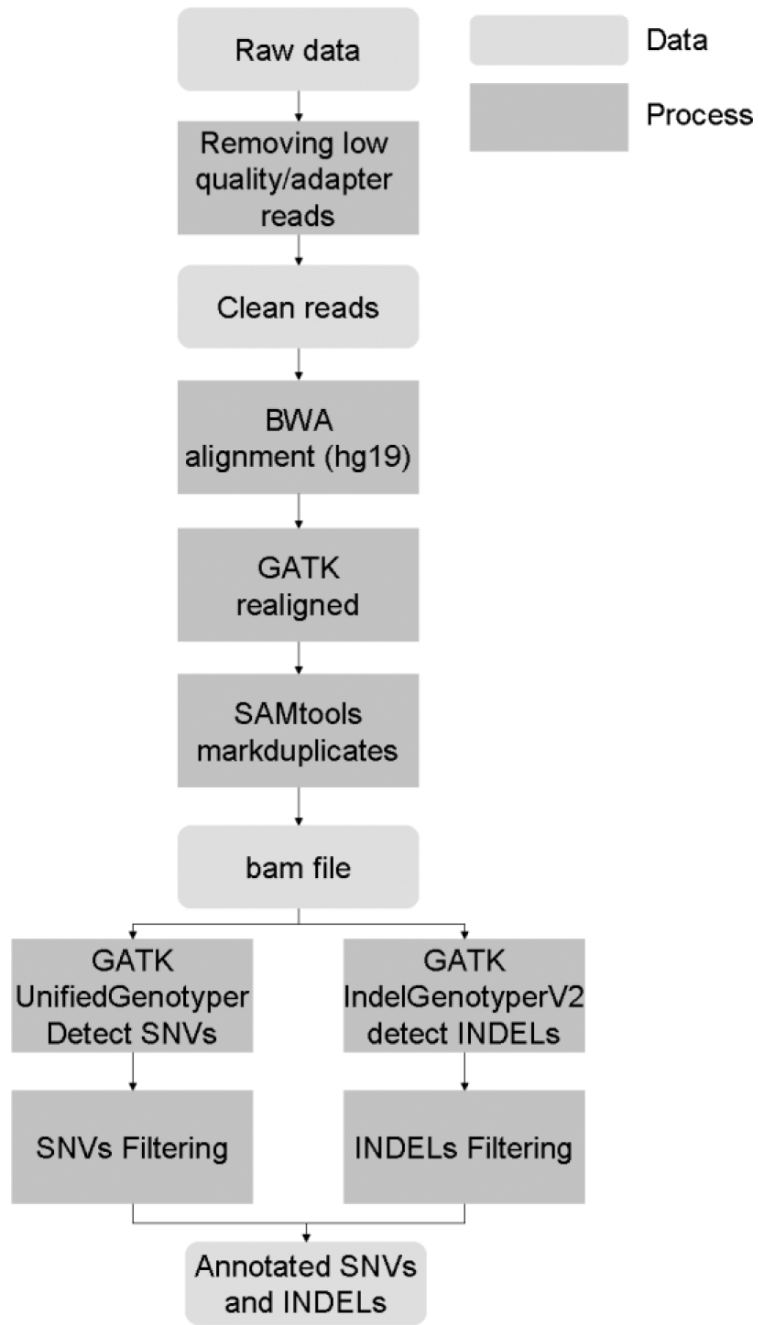

**Supplementary Figure S1: The work flow of gene variation analysis.**

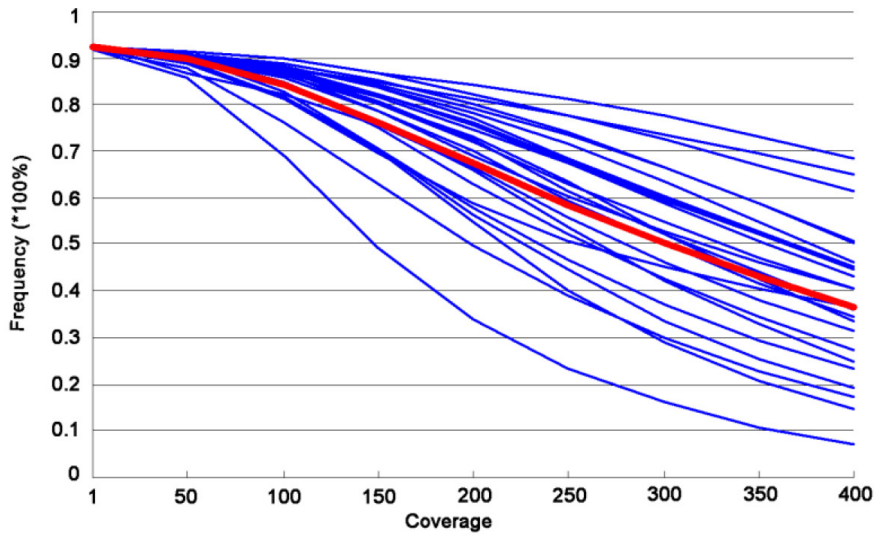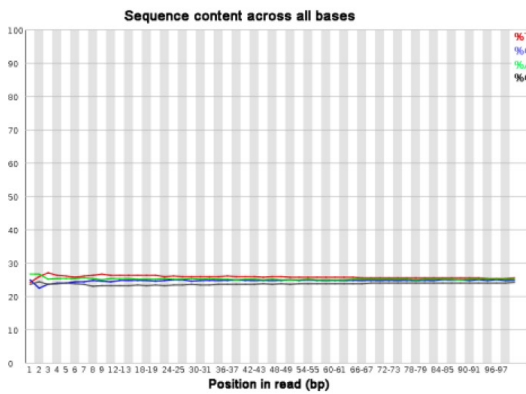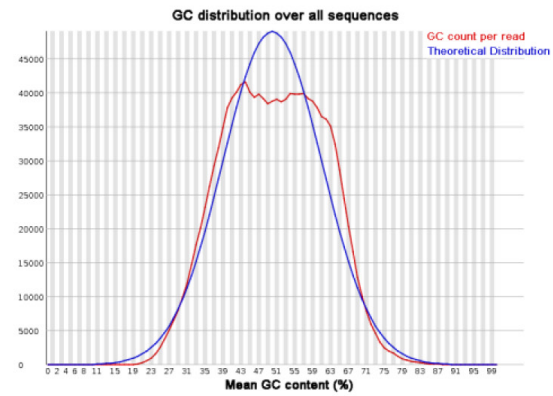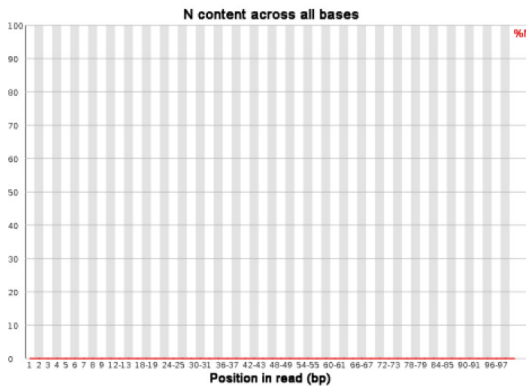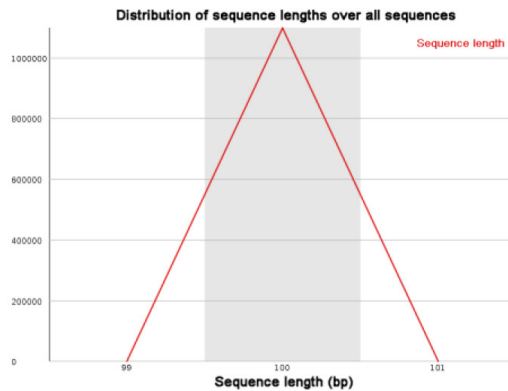

**Supplementary Figure S2: Quality control of next-generation sequencing.** All parameters (including average coverage of sequencing, sequence content of four bases, actual GC distribution, the proportion of N appearing, and the distribution of fragment sizes) guaranteed the accuracy of sequencing and established the foundation for data elucidation.

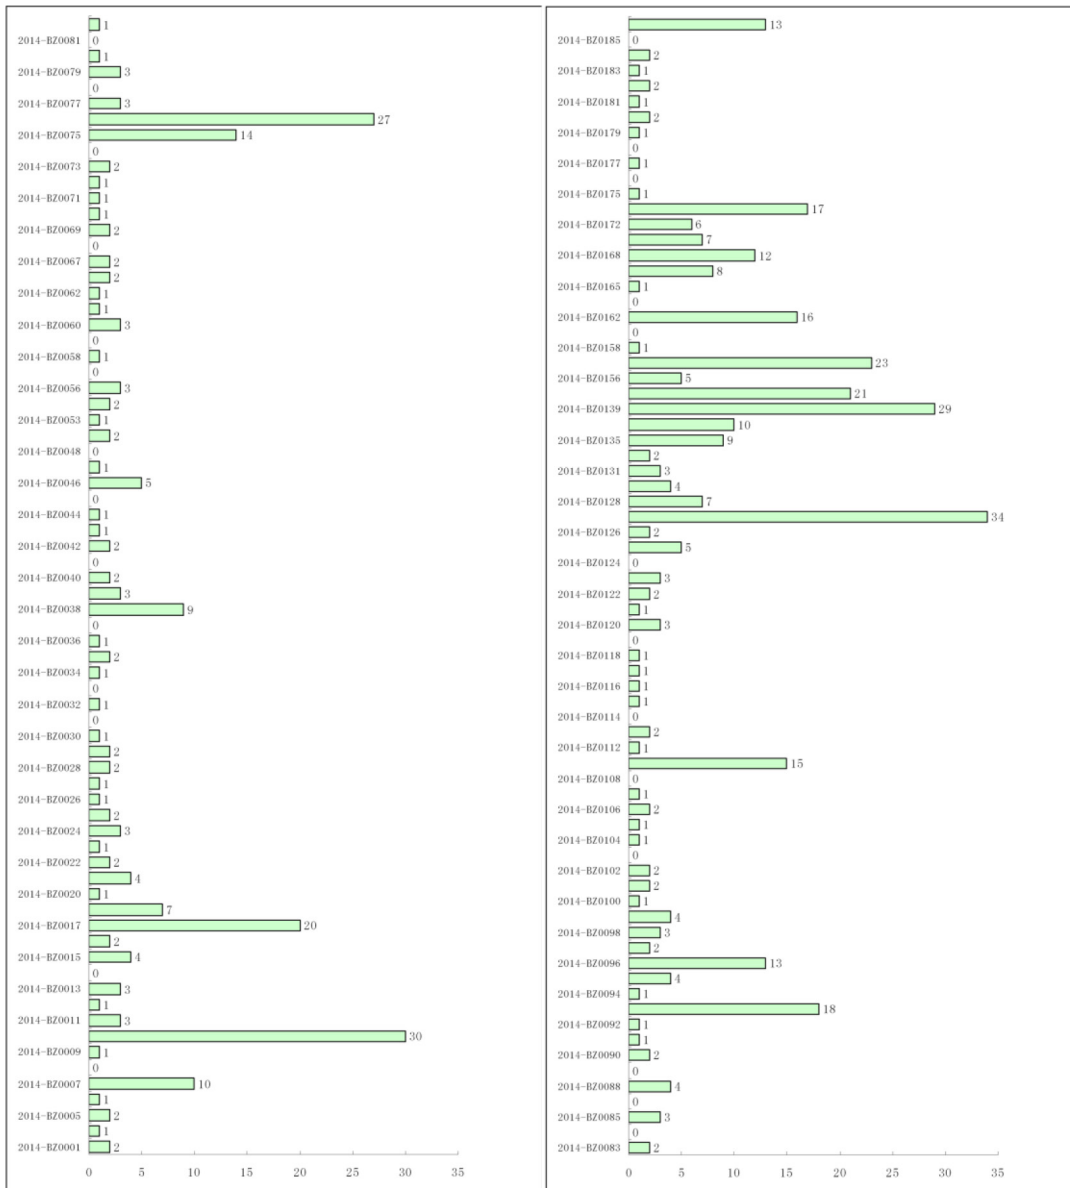

**Supplementary Figure S3: The number of variants in 146 patients.** Among all patients, 119 cases had at least one nonsynonymous or deletion variant in the captured gene set. The number of variants in all patients ranged from 0 to 34 with a median of 2.

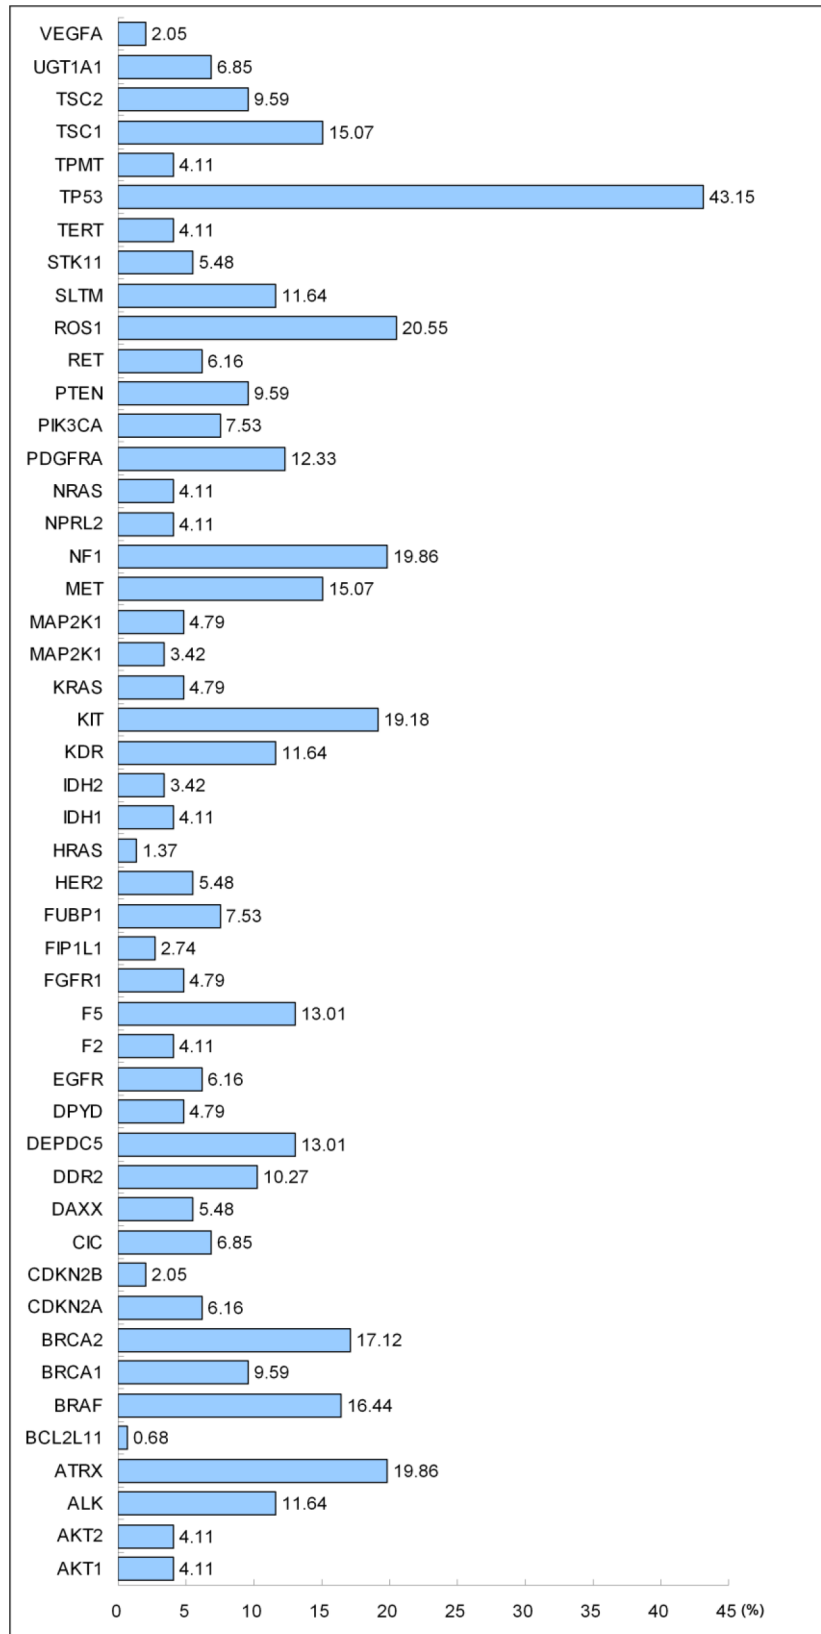

**Supplementary Figure S4: The frequency of variants in our cohort.** Whether these variants participated in tumorigenesis of GISTs need to be further investigated.

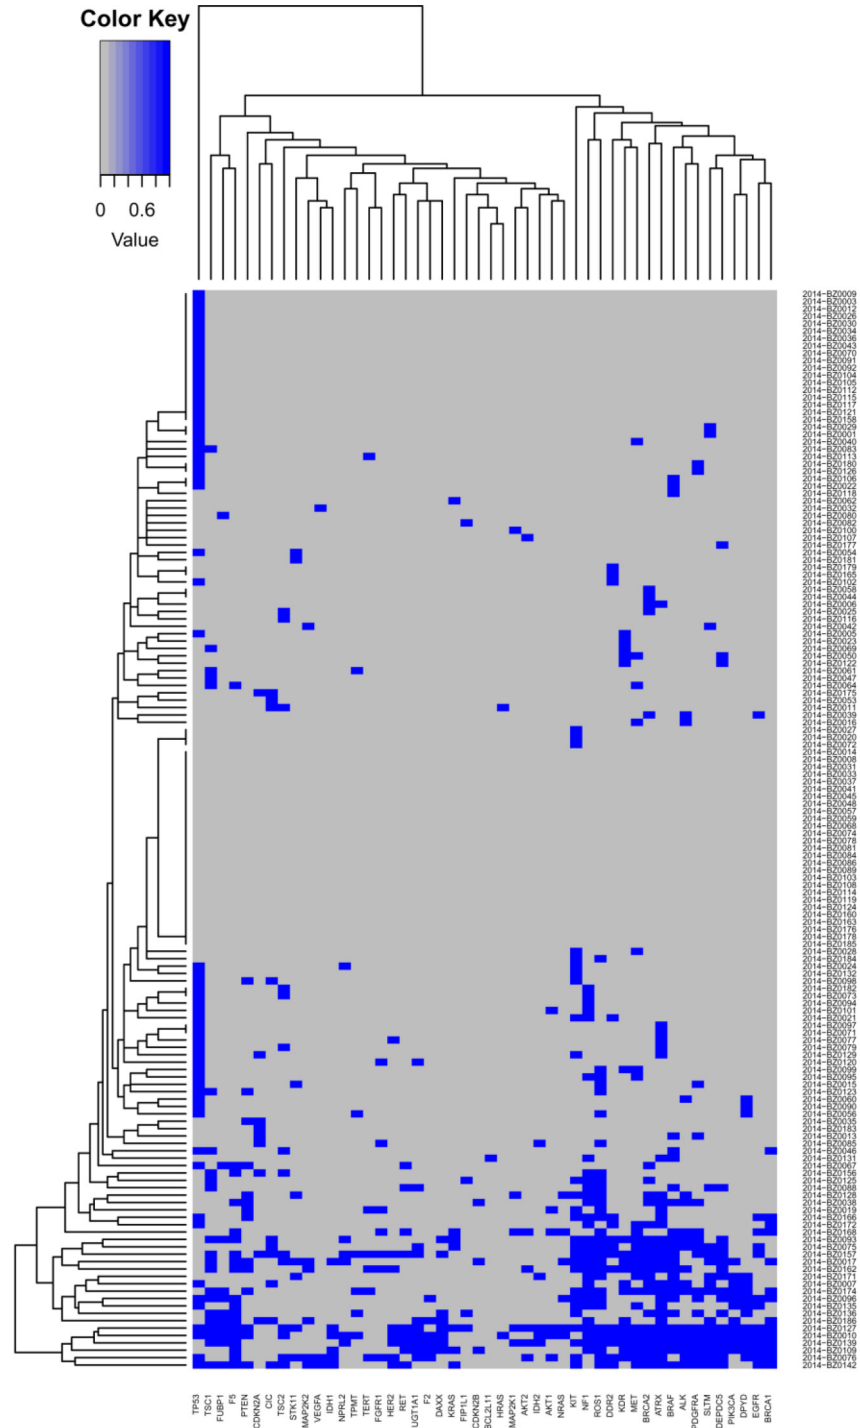

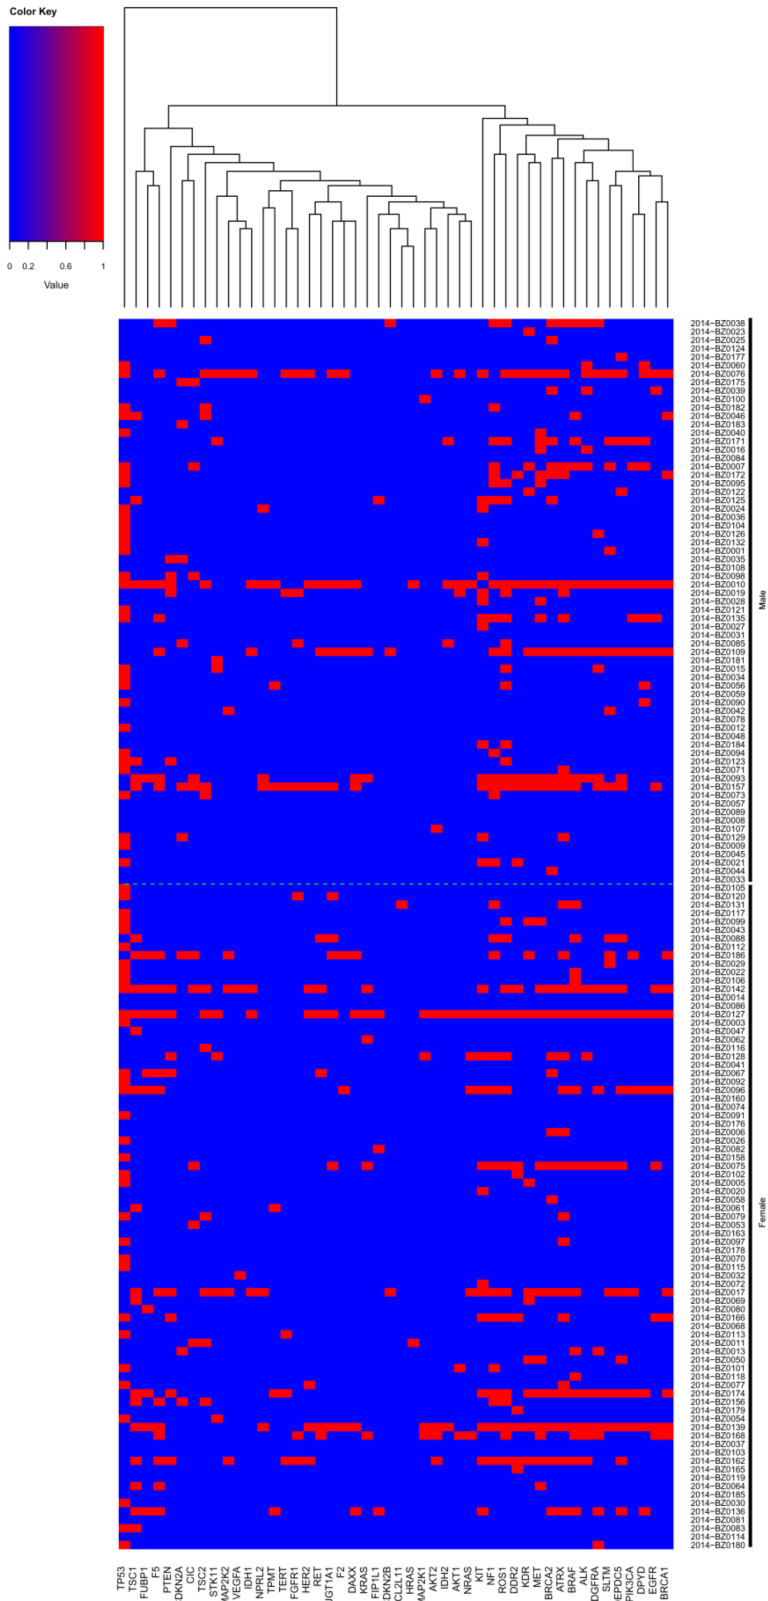



Color Key

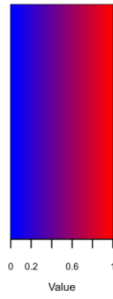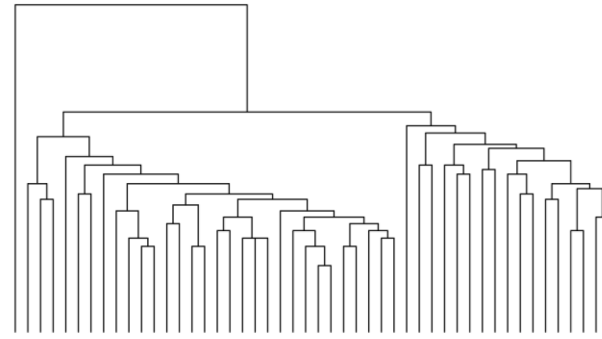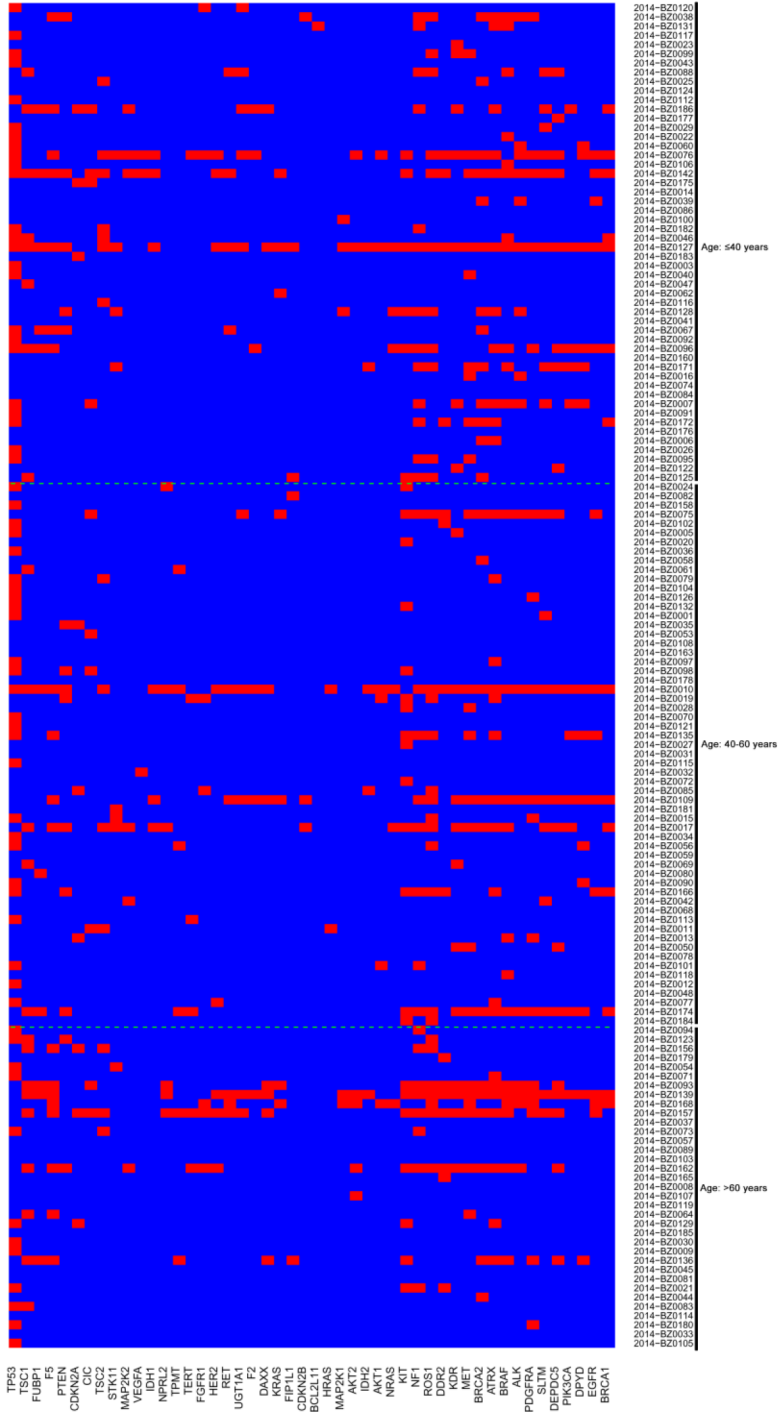

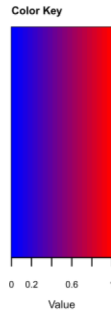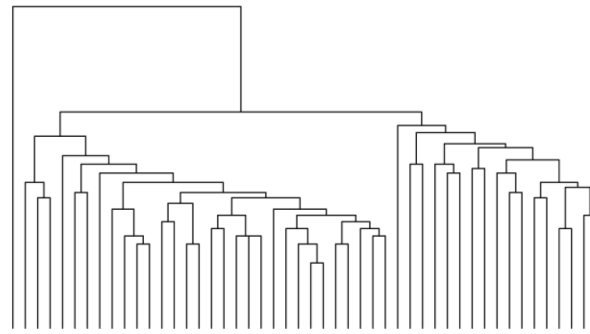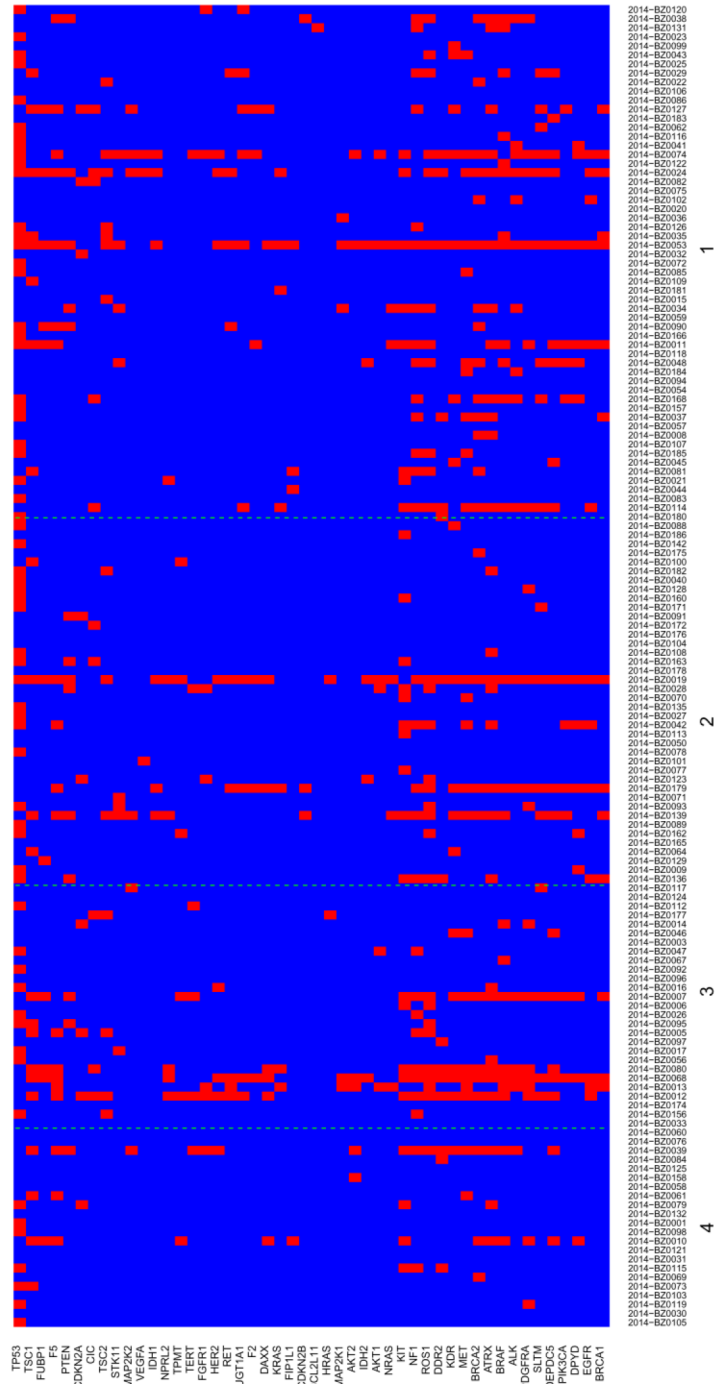

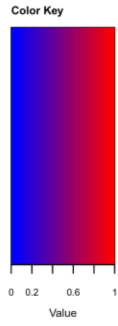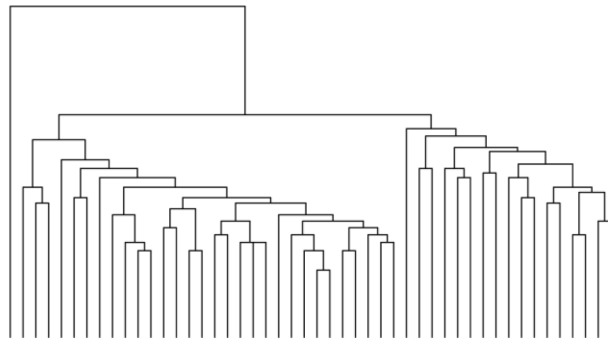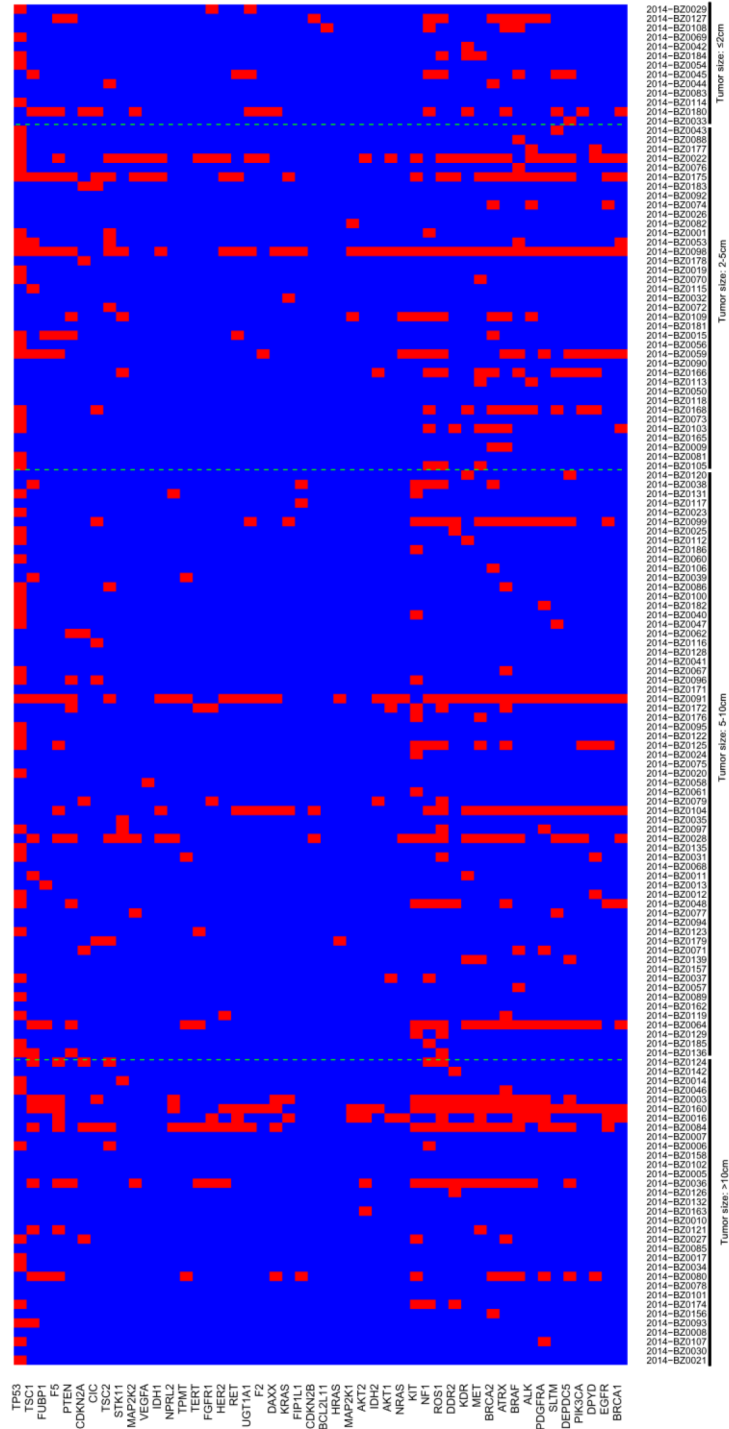

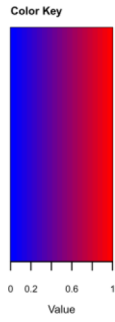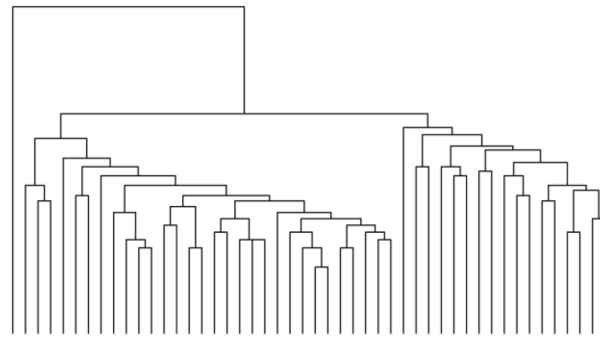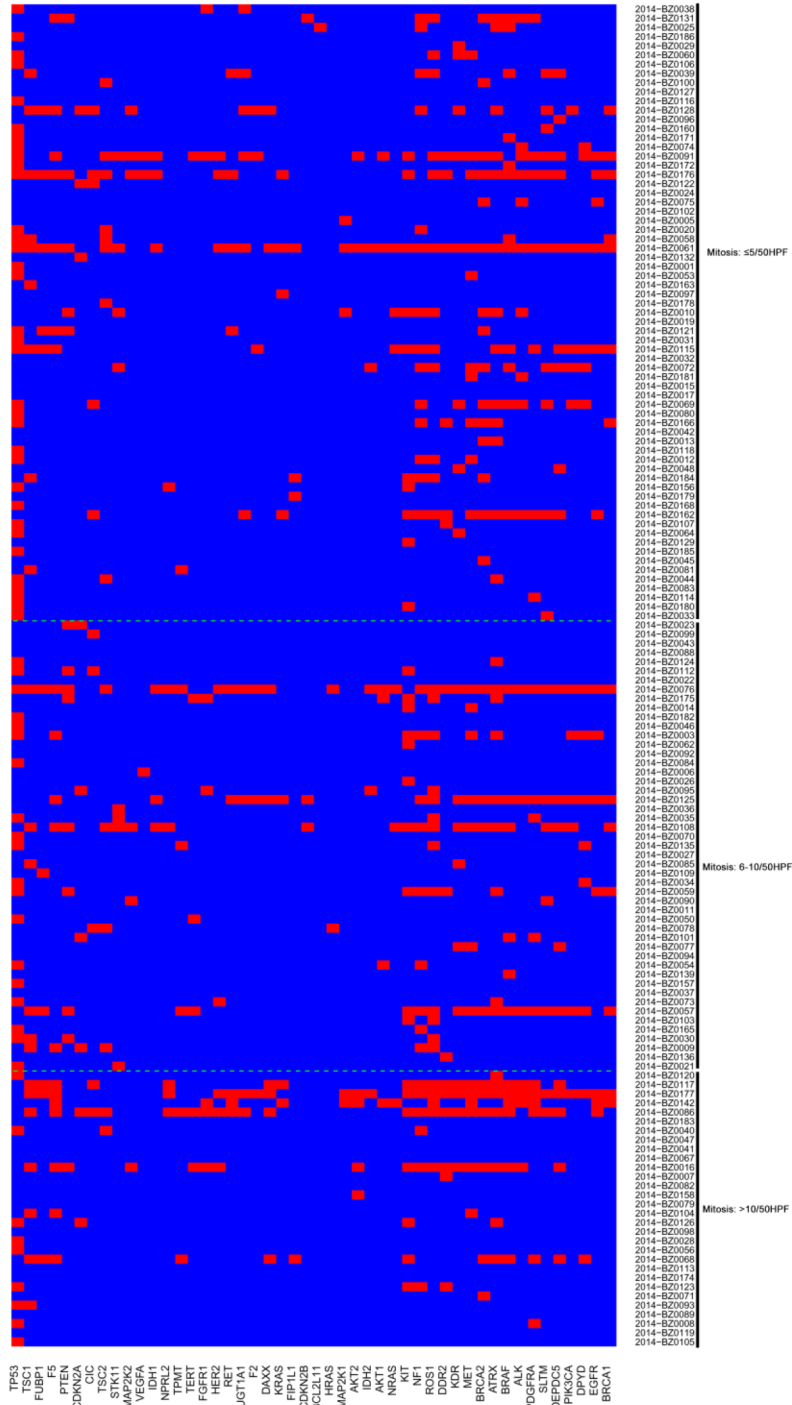

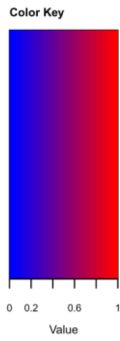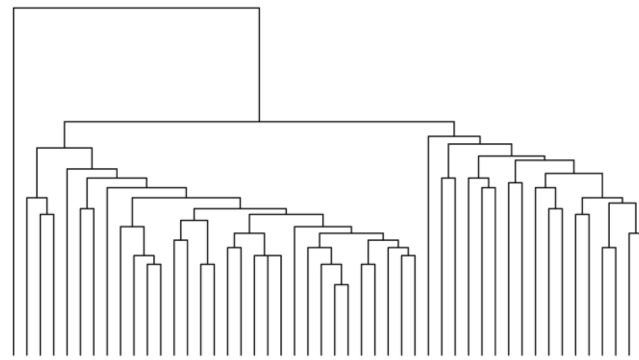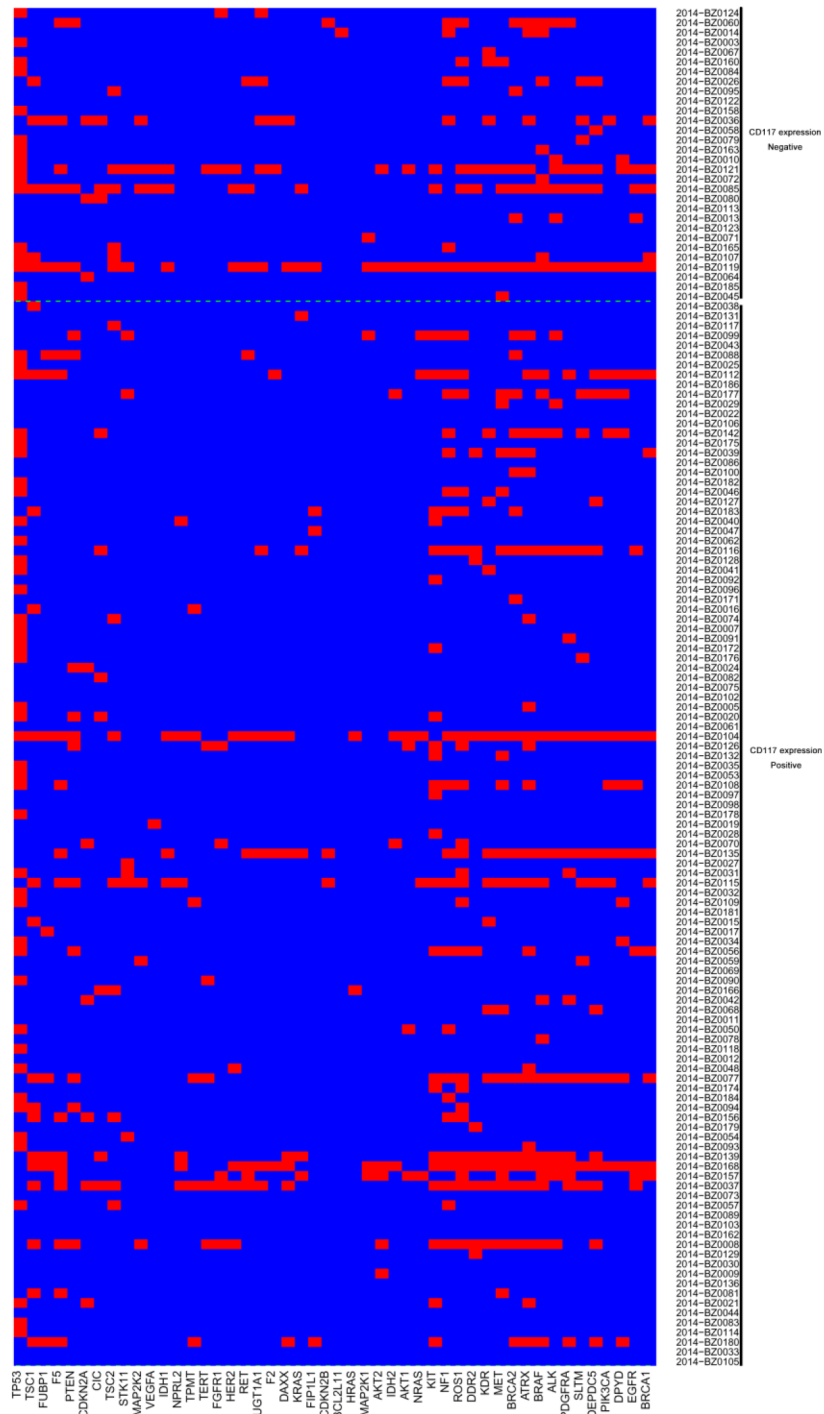

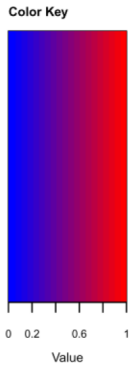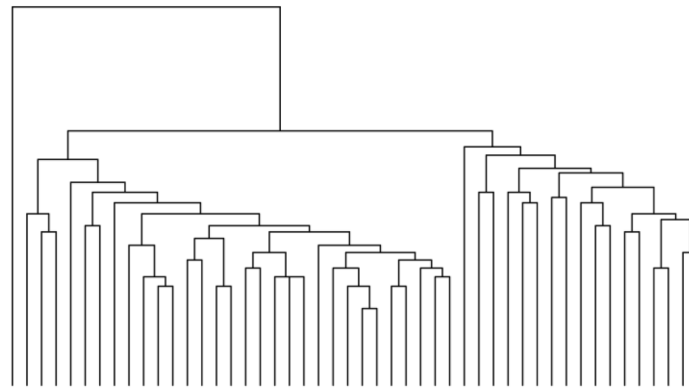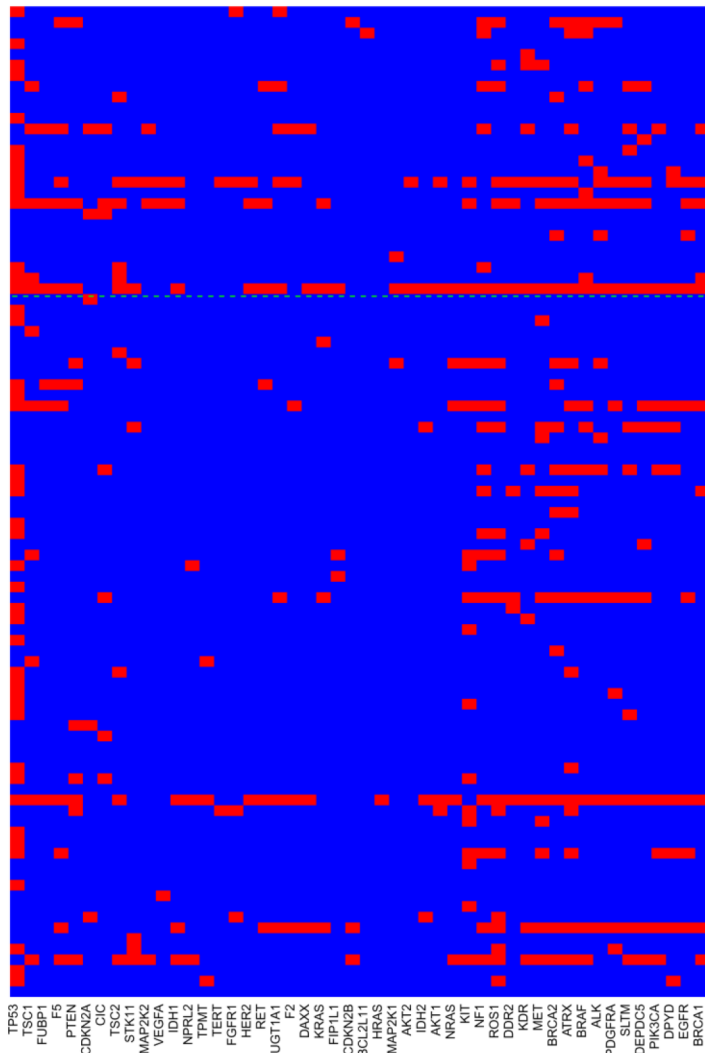

2014-BZ0117  
 2014-BZ0186  
 2014-BZ0086  
 2014-BZ0092  
 2014-BZ0084  
 2014-BZ0122  
 2014-BZ0158  
 2014-BZ0036  
 2014-BZ0058  
 2014-BZ0061  
 2014-BZ0079  
 2014-BZ0163  
 2014-BZ0098  
 2014-BZ0028  
 2014-BZ0121  
 2014-BZ0031  
 2014-BZ0115  
 2014-BZ0072  
 2014-BZ0085  
 2014-BZ0109  
 2014-BZ0113  
 2014-BZ0071  
 2014-BZ0089  
 2014-BZ0165  
 2014-BZ0185  
 2014-BZ0030  
 2014-BZ0038  
 2014-BZ0088  
 2014-BZ0025  
 2014-BZ0124  
 2014-BZ0112  
 2014-BZ0022  
 2014-BZ0106  
 2014-BZ0175  
 2014-BZ0039  
 2014-BZ0100  
 2014-BZ0182  
 2014-BZ0046  
 2014-BZ0127  
 2014-BZ0183  
 2014-BZ0040  
 2014-BZ0047  
 2014-BZ0062  
 2014-BZ0116  
 2014-BZ0067  
 2014-BZ0171  
 2014-BZ0074  
 2014-BZ0091  
 2014-BZ0172  
 2014-BZ0176  
 2014-BZ0095  
 2014-BZ0075  
 2014-BZ0104  
 2014-BZ0126  
 2014-BZ0035  
 2014-BZ0108  
 2014-BZ0097  
 2014-BZ0178  
 2014-BZ0019  
 2014-BZ0070  
 2014-BZ0027  
 2014-BZ0181  
 2014-BZ0015  
 2014-BZ0059  
 2014-BZ0069  
 2014-BZ0080  
 2014-BZ0090  
 2014-BZ0042  
 2014-BZ0078  
 2014-BZ0101  
 2014-BZ0118  
 2014-BZ0048  
 2014-BZ0094  
 2014-BZ0123  
 2014-BZ0054  
 2014-BZ0093  
 2014-BZ0168  
 2014-BZ0037  
 2014-BZ0057  
 2014-BZ0103  
 2014-BZ0162  
 2014-BZ0107  
 2014-BZ0119  
 2014-BZ0064  
 2014-BZ0129  
 2014-BZ0081  
 2014-BZ0021  
 2014-BZ0044  
 2014-BZ0083  
 2014-BZ0114  
 2014-BZ0180  
 2014-BZ0033

DOG-1 expression  
 Negative

DOG-1 expression  
 Positive

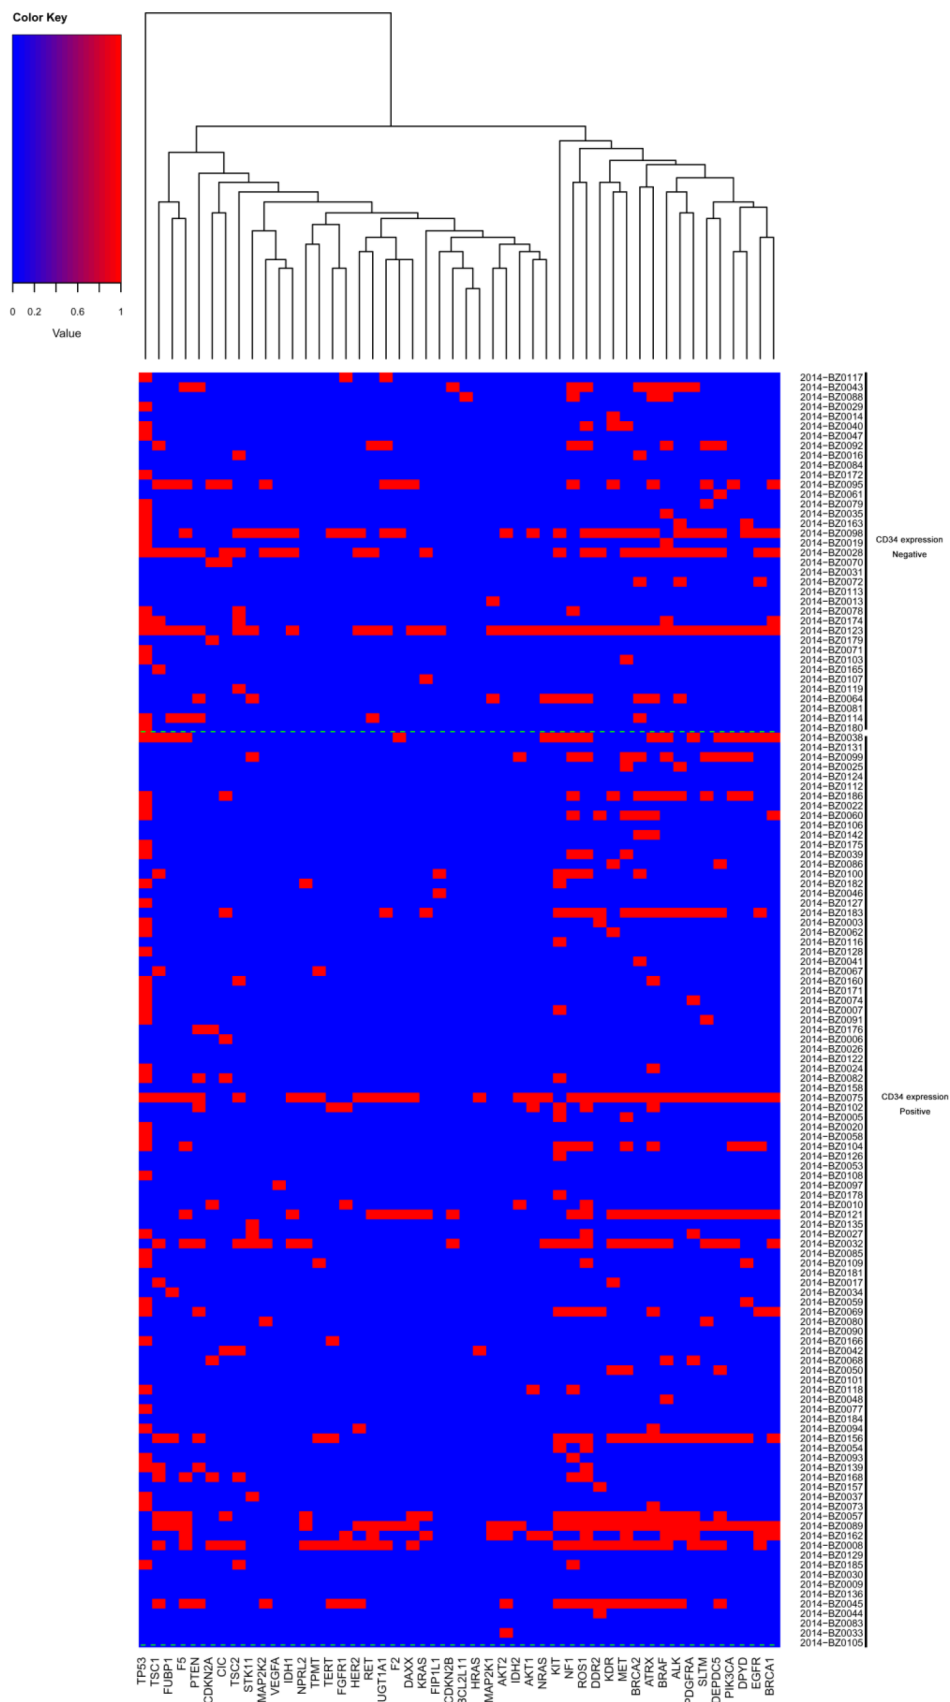

**Supplementary Figure S5-S13: Variation profile of 48 genes based on clinicopathological features.** Hierarchical cluster analysis result for all patients (S5), and stratified cluster analysis indicated that no obvious differences of variation profile were found between sex (S6), age (S7), tumor sites (S8), tumor sizes (S9), mitosis (S10), CD117 (S11), DOG-1 (S12), and CD34 (S13) expressions.
